# Supplementary material for: When Affirmation Isn’t Enough: The Conditional Effects of Mindfulness and Early Adverse Experiences on LGBQ Wellness
Source: Research Square preprint supplement (doi:10.21203/rs.3.rs-6668586/v1), 2025-05-23
Supplement: Supplementary file 1 [file 924b2bb7401f40644c01bf1d.docx]

**Supplementary Table 1**

*Unstandardized Coefficients of the Structural Model*

|  | Base Model | Interaction Model |
| --- | --- | --- |
| Predictor | LGBQ Collective self-esteem | |
| Level 1 (within-person) | Fixed effects | |
| Affirmative ISE | **.17 [.06, .27]** | **.15 [.06, .25]** |
| Invalidating ISE | -.08 [-.18, .02] | -.10 [-.19, .001] |
| Level 2 (between-person) |  |  |
| Intercept | **2.88 [2.74, 3.01]** | **2.88 [2.73, 3.03]** |
| SGM-ACEs | **-.21 [-.33, -.08]** | -.14 [-.29, -.004] |
| Mindfulness | **.18 [.08, .33]** | **.16 [.01, .31]** |
| Cross-level interaction |  |  |
| Affirmative ISE x SGM-ACEs | - | **-.10 [-.20, -.001]** |
| Invalidating ISE x SGM-ACEs | - | -.08 [-.18, .01] |
| Affirmative ISE x Mindfulness | - | -.01 [-.11, .09] |
| Invalidating ISE x Mindfulness | - | .06 [-.04, .15] |
| Level 1 | Random effect variances | |
| Residual | **.08 [.04, .11]** | **.06 [.01, .13]** |
| Level 2 |  |  |
| Intercept | **.71 [.56, .95]** | **.72 [.54, .95]** |
| Affirmative ISE slope | **.20 [.11, .33]** | **.24 [.08, .39]** |
| Invalidating ISE slope | **.17 [.11, .27]** | **.21 [.05, .36]** |
| Predictor | Nonattachment | |
| Level 1 (within-person) | Fixed effects | |
| Affirmative ISE | .03 [-.11, .17] | .02 [-.11, .16] |
| Invalidating ISE | **-.55 [-.70, -.40]** | **-.55 [-.71, -.40]** |
| Level 2 (between-person) |  |  |
| Intercept | **3.07 [2.91, 3.23]** | **3.07 [2.91, 3.22]** |
| SGM-ACEs | **-.30 [-.42, -.17]** | **-.18[-.34, -.03]** |
| Mindfulness | **.15 [.03, .27]** | .09 [-.07, .25] |
| Cross-level interaction |  |  |
| Affirmative ISE x SGM-ACEs | - | **-.18 [-.32, -.04]** |
| Invalidating ISE x SGM-ACEs | - | -.08 [-.23, .08] |
| Affirmative ISE x Mindfulness | - | .08 [-.06, .23] |
| Invalidating ISE x Mindfulness | - | .06 [-.10, .22] |
| Level 1 | Random effect variances | |
| Residual | **.14 [.01, .33]** | **.18 [.03, .34]** |
| Level 2 |  |  |
| Intercept | **.75 [.47, 1.04]** | **.69 [.45, .99]** |
| Affirmative ISE slope | **.45 [.06, .79]** | **.32 [.07, .69]** |
| Invalidating ISE slope | **.58 [.16, .95]** | **.51 [.13, .91]** |
| Predictor | Positive affect | |
| Level 1 (within-person) | Fixed effects | |
| Affirmative ISE | **.28 [.08, .48]** | **.27 [.07, .48]** |
| Invalidating ISE | **-.45 [-.61, -.30]** | **-.45 [-.61, -.30]** |
| Level 2 (between-person) |  |  |
| Intercept | **1.44 [1.26, 1.61]** | **1.44 [1.27, 1.61]** |
| SGM-ACEs | **-.16 [-.32, -.01]** | -.12 [-.29, .06] |
| Mindfulness | **.24 [.09, .40]** | .**36 [.18, .54]** |
| Cross-level interaction |  |  |
| Affirmative ISE x SGM-ACEs | - | -.14 [-.34, .07] |
| Invalidating ISE x SGM-ACEs | - | -.02 [-.16, .15] |
| Affirmative ISE x Mindfulness | - | **-.20 [-.40, .00]** |
| Invalidating ISE x Mindfulness | - | **-.19 [-.34, -.02]** |
| Level 1 | Random effect variances | |
| Residual | **.16 [.02, .35]** | **.22 [.02 .42]** |
| Level 2 |  |  |
| Intercept | **.96 [.67, 1.32]** | **.90 [.56, 1.29]** |
| Affirmative ISE slope | **1.17 [.70, 1.70]** | **1.05 [.49, 1.65]** |
| Invalidating ISE slope | **.54 [.16, .92]** | **.41 [.05, .90]** |
| Predictor | Negative affect | |
| Level 1 (within-person) | Fixed effects | |
| Affirmative ISE | -.03 [-.15, .08] | -.04 [ -.14, .07] |
| Invalidating ISE | **.43 [.26, .55]** | **.42 [.30, .54]** |
| Level 2 (between-person) |  |  |
| Intercept | **.69 [.55, .81]** | **.70 [.57, .83]** |
| SGM-ACEs | **.16 [.05, .27]** | .09 [-.05, .22] |
| Mindfulness | **-.14 [-.24, -.03]** | -.08 [-.21, .06] |
| Cross-level interaction |  |  |
| Affirmative ISE x SGM-ACEs | - | **.12 [.01, .23]** |
| Invalidating ISE x SGM-ACEs | - | .03 [-.09, .16] |
| Affirmative ISE x Mindfulness | - | -.07 [-.18, .04] |
| Invalidating ISE x Mindfulness | - | **-.13 [-.25, -.003]** |
| Level 1 | Random effect variances | |
| Residual | **.08 [.04, .14]** | **.06 [.004, .18]** |
| Level 2 |  |  |
| Intercept | **.53 [.40, .74]** | **.54 [.37, .73]** |
| Affirmative ISE slope | **.25 [.15, .38]** | **.28 [.04, .45]** |
| Invalidating ISE slope | **.38 [.26, .55]** | **.41 [15, .62]** |
| Predictor | Somatic Distress | |
| Level 1 (within-person) | Fixed effects | |
| Affirmative ISE | .01 [-.06, .07] | .01 [-.05, .07] |
| Invalidating ISE | **.09 [.03, .15]** | **.09 [.03, .15]** |
| Level 2 (between-person) |  |  |
| Intercept | **.43 [.35, .53]** | **.44 [.35, .53]** |
| SGM-ACEs | **.16 [.07, .25]** | **.12 [.03, .21]** |
| Mindfulness | -.07 [-.16, .02] | -.05 [-.14, .04] |
| Cross-level interaction |  |  |
| Affirmative ISE x SGM ACEs | - | **.08 [.02, .14]** |
| Invalidating ISE x SGM ACEs | - | **.08 [.01, .14]** |
| Affirmative ISE x Mindfulness | - | -.04 [-.10, .02] |
| Invalidating ISE x Mindfulness | - | -.04 [-.10, .02] |
| Level 1 | Random effect variances | |
| Residual | **.03 [.003, .06]** | **.03 [.003, .07]** |
| Level 2 |  |  |
| Intercept | **.29 [.21, .38]** | **.29 [.21, .38]** |
| Affirmative ISE slope | **.08 [.01, .15]** | **.07 [.01, .14]** |
| Invalidating ISE slope | **.08 [.02, .15]** | **.08 [.01, .15]** |
| Predictor | RMSSD | |
| Level 1 (within-person) | Fixed effects | |
| Affirmative ISE | .02 [-.14, .18] | .01 [ -.15, .18] |
| Invalidating ISE | .07 [-.04, .18] | .07 [-.05, .18] |
| Level 2 (between-person) |  |  |
| Intercept | 4.32 [4.19, 4.44] | 4.32 [4.19, 4.44] |
| SGM-ACEs | -.02 [-.08, .05] | .02 [-.11, .14] |
| Mindfulness | -.02 [-.08, .05] | .03 [-.10. .16] |
| Cross-level interaction |  |  |
| Affirmative ISE x SGM ACEs | - | .-.01 [-.17, .15] |
| Invalidating ISE x SGM ACEs | - | -.04 [-.16, .08] |
| Affirmative ISE x Mindfulness | - | -.03 [-.18,.13] |
| Invalidating ISE x Mindfulness | - | -.05 [-.17, .06] |
| Level 1 | Random effect variances | |
| Residual | **.05 [.01, .12]** | **.06 [.01, .12]** |
| Level 2 |  |  |
| Intercept | **.51 [.37, .68]** | **.51 [.37, .68]** |
| Affirmative ISE slope | **.79 [.56, 1.05]** | **.80 [.56, 1.08]** |
| Invalidating ISE slope | **.37 [.22, .53]** | **.38 [.22, .56]** |
| Predictor | LF/HF ratio | |
| Level 1 (within-person) | Fixed effects | |
| Affirmative ISE | .03 [-.08. .13] | .03 [-.08. .13] |
| Invalidating ISE | .02 [-.08, .13] | .02 [-.08, .13] |
| Level 2 (between-person) |  |  |
| Intercept | **-.31 [-.40, -.23]** | **-.31 [-.40, -.23]** |
| SGM-ACEs | .04 [-.04, .11] | .-.001 [-.09, .09] |
| Mindfulness | **.09 [.02, .16]** | **.11 [.02, .20]** |
| Cross-level interaction |  |  |
| Affirmative ISE x SGM-ACEs | - | -.02 [-.13, .08] |
| Invalidating ISE x SGM-ACEs | - | **.14 [.03, .24]** |
| Affirmative ISE x Mindfulness | - | -.07 [-.17, .04] |
| Invalidating ISE x Mindfulness | - | .01 [-.10, .12] |
| Level 1 | Random effect variances | |
| Residual | **.09 [.01, .18]** | **.08 [.01, .18]** |
| Level 2 |  |  |
| Intercept | **.19 [.09, .30]** | **.20 [.09, .30]** |
| Affirmative ISE slope | **.20 [.04, .41]** | **.22 [.03, .40]** |
| Invalidating ISE slope | **.22 [.05, .43]** | **.22 [.05, .41]** |

*Note.* Base model features the main effects only; interaction model features both main effects and cross-level interactions. The boldface coefficients were significantly different from zero based on 95% credible intervals. ISE = identity-salient experience; SGM-ACEs = sexual and gender minority adverse childhood experiences.

**Supplementary Table 2**

*Significant Conditional Direct Effects of Conditions on Momentary Outcomes at Different Levels of SGM-ACEs*

|  |  | LGBQ Collective Self-esteem | |
| --- | --- | --- | --- |
| Condition | Levels of SGM-ACEs |  | 95% CI |
| Affirmative ISE | **Low (-1SD)** | **.26** | **[.12, .40]** |
|  | **Mean** | **.15** | **[.06, .25]** |
|  | High (+1 SD) | .05 | [-.09, .20] |
|  |  | Nonattachment | |
| Condition | Levels of SGM-ACEs |  | 95% CI |
| Affirmative ISE | Low (-1 SD) | .21 | [.00, .40] |
|  | Mean | .02 | [-.11, .16] |
|  | High (+1 SD) | -.16 | [-.36, .04] |
|  |  | Negative affect | |
| Condition | Levels of SGM-ACEs |  | 95% CI |
| Affirmative ISE | **Low (-1 SD)** | **-.16** | **[-.31, -.01]** |
|  | Mean | -.04 | [-.14, .07] |
|  | High (+1 SD) | .08 | [-.06, .23] |
|  |  | Somatic distress | |
| Condition | Levels of SGM-ACEs |  | 95% CI |
| Affirmative ISE | Low (-1 SD) | -.08 | [-.16, .01] |
|  | Mean | .01 | [-.05, .07] |
|  | **High (+1 SD)** | **.09** | **[.01, .18]** |
| Invalidating ISE | Low (-1 SD) | .01 | [-.08, .10] |
|  | **Mean** | **.09** | **[.03, .15]** |
|  | **High (+1 SD)** | **.17** | **[.08, .25]** |
|  |  | LF/HF Ratio | |
| Condition | Levels of SGM ACEs |  | 95% CI |
| Invalidating ISE | Low (-1 SD) | -.11 | [.-.26, .04] |
|  | Mean | .02 | [-.08, .13] |
|  | **High (+1 SD)** | **.16** | **[.02, .30]** |

*Note*. The boldface coefficients were significantly different from zero based on 95% credible intervals. ISE = identity-salient experience; SGM-ACEs = sexual and gender minority adverse childhood experiences.

**Supplementary Table 3**

*Significant Conditional Direct Effects of Conditions on Momentary Affect at Different Levels of Dispositional Mindfulness*

|  | | Positive affect | |
| --- | --- | --- | --- |
| Condition | Levels of mindfulness |  | 95% CI |
| Affirmative ISE | **Low (-1 SD)** | **.48** | **[.20, .76]** |
|  | **Mean** | **.27** | **[.07, .48]** |
|  | High (+1 SD) | .07 | [-.21, .36] |
| Invalidating ISE | **Low (-1 SD)** | **-.27** | **[-.50, -.05]** |
|  | **Mean** | **-.45** | **[-.61, -.30]** |
|  | **High (+1 SD)** | **-.64** | **[-.86, -.42]** |
|  |  | Negative affect | |
| Condition | Levels of mindfulness |  | 95% CI |
| Invalidating ISE | **Low (-1 SD)** | **.55** | **[.37, .72]** |
|  | **Mean** | **.42** | **[.30, .54]** |
|  | **High (+1 SD)** | **.29** | **[.12, .47]** |

*Note*. The boldface coefficients were significantly different from zero based on 95% credible intervals. ISE = identity-salient experience.

**Supplementary Table 4**

*Model statistics for Multilevel Models Predicting Momentary Outcome Variables from Identity-Salient Experience and Moderators*

|  |  | % of variance explained | | | |
| --- | --- | --- | --- | --- | --- |
|  |  | LGBQ Collective self-esteem | | | |
| Model | DIC |  |  | +ISEs | -ISEs |
| Base model | 1373.39 | 30.50 | 5.30 | - | - |
| Interaction model | 1045.98 | 39.20 | 3.60 | 2.80 | 3.00 |
|  |  | Nonattachment | | | |
| Model | DIC |  |  | +ISEs | -ISEs |
| Base model | 1451.04 | 56.40 | 7.10 | - | - |
| Interaction model | 1634.58 | 36.70 | 3.30 | 6.80 | 1.80 |
|  |  | Positive affect | | | |
| Model | DIC |  |  | +ISEs | -ISEs |
| Base model | 1539.94 | 52.10 | 4.70 | - | - |
| Interaction model | 1625.26 | 40.80 | 7.80 | 3.30 | 4.90 |
|  |  | Negative affect | | | |
| Model | DIC |  |  | +ISEs | -ISEs |
| Base model | 1388.53 | 47.00 | 4.40 | - | - |
| Interaction model | 1070.88 | 43.20 | 1.70 | 4.10 | 2.60 |
|  |  | Somatic distress | | | |
| Model | DIC |  |  | +ISEs | -ISEs |
| Base model | 852.54 | 32.30 | 5.60 | - | - |
| Interaction model | 802.44 | 21.90 | 3.30 | 6.40 | 5.40 |
|  |  | RMSSD | | | |
| Model | DIC |  |  | +ISEs | -ISEs |
| Base model | 1160.97 | 34.80 | .20 | - | - |
| Interaction model | 1091.82 | 36.10 | .60 | .60 | .010 |
|  |  | LF/HF ratio | | | |
| Model | DIC |  |  | +ISEs | -ISEs |
| Base model | 1266.41 | 35.90 | 2.80 | - | - |
| Interaction model | 1245.77 | 34.60 | 3.60 | 1.90 | 4.80 |

*Note.* Base model features the main effects only; interaction model features both main effects and cross-level interactions.
= outcome at within-person level; = outcome at between-person level; +ISEs = slope of affirmative identity-salient experience condition at between-person level; -ISEs = slope of invalidating identity-salient experience condition at between-person level.
